# Supplementary material
Source: PubMed Central journal article supplement (PMC4019032)
Supplement: MCB.01723-13_zmb999100420so2.pdf [file MCB.01723-13_zmb999100420so2.pdf]

Supplementary Figure 2

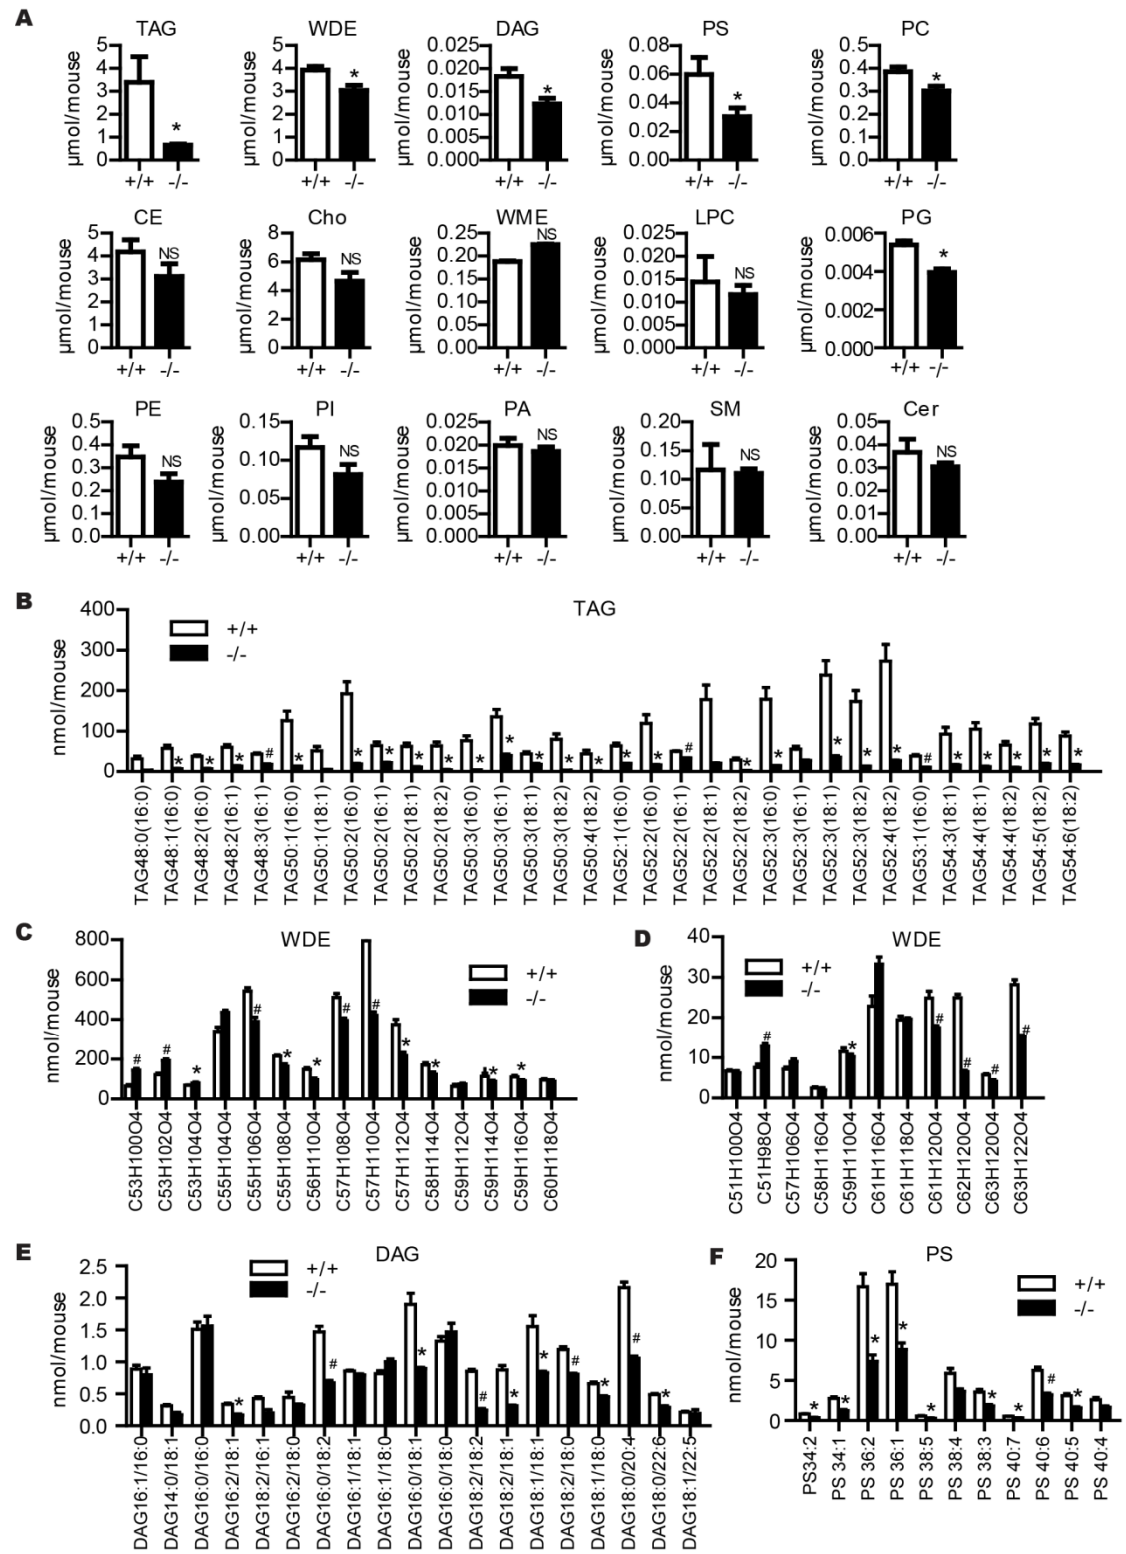

Figure S2. Lipidomics analysis of skin surface lipids

(A) Reduced levels of TAG, DAG, WDE and PS in skin surface lipids from 3-month-old by lipidomic analysis. Phosphatidylcholine (PC) and phosphatidyl glycerol (PG) were also slightly lower. Cholesterol ester (CE), cholesterol (Cho), wax mono-ester (WME), LysoPC (LPC), phosphatidylethanolamine (PE), phosphatidylinositol (PI), phosphatidic acid (PA), sphingomyelin (SM), ceramide (Cer) were similar between wild-type and *Cidea*<sup>-/-</sup> mice. n=5 for each genotype. Error bars represented means  $\pm$  SEM. \*  $P < 0.05$ . NS, no statistical significance.

(B-F) High-resolution mass spectrometry analysis of individual species of TAG (B), WDE (C and D), DAG (E) and PS (F) in skin surface lipids of 3-month-old wild-type (+/+) and *Cidea*<sup>-/-</sup> (-/-) mice. Concentrations of all individual species of TAG (G) species are markedly lower (only abundant ones were shown here). n=5 for each genotype. Error bars represented means  $\pm$  SEM. \*  $P < 0.05$ , #  $P < 0.01$ .
